# Supplementary material for: Functional Analysis of Hsp70 Inhibitors
Source: PubMed Central journal article supplement (PMC3827032; doi:10.1371/journal.pone.0078443), 2013-11-12
Supplement: pone.0078443.s004.pdf [file pone.0078443.s004.pdf]

**Table S3: Crystallographic data and refinement parameters.**

---

| Data-collection details                             |                                                                             |
|-----------------------------------------------------|-----------------------------------------------------------------------------|
| Space group                                         | P2 <sub>1</sub>                                                             |
| Unit-Cell parameters [Å, °]                         | a=58.68, b= 53.97, c= 70.80;<br>$\alpha = 90.0 \beta = 101.1 \gamma = 90.0$ |
| Resolution [Å]                                      | 2.6                                                                         |
| Data collection wavelength [Å]                      | 1.00000                                                                     |
| Number of measurements                              | 36 077                                                                      |
| Number of unique reflections                        | 12 776                                                                      |
| Completeness[%] <sup>[a]</sup>                      | 92.3 (82.0)                                                                 |
| R <sub>merge</sub> [%]                              | 9.0 (36.4)                                                                  |
| $\langle I/\sigma(I) \rangle$ <sup>[a]</sup>        | 10.1 (2.5)                                                                  |
| Refinement                                          |                                                                             |
| Nr. of molecules / asymmetric unit                  | 1                                                                           |
| R <sub>work</sub> /R <sub>free</sub> <sup>[b]</sup> | 0.167 / 0.239                                                               |
| Rmsd bond length [Å]                                | 0.010                                                                       |
| Rmsd bond angle [°]                                 | 1.1                                                                         |
| <u>Average B-factor [Å<sup>2</sup>]</u>             |                                                                             |
| Protein                                             | 33.8                                                                        |
| Ligand                                              | 27.8                                                                        |
| Water                                               | 30.3                                                                        |
| All atoms                                           | 33.6                                                                        |
| <u>Number of atoms</u>                              |                                                                             |
| Protein atoms                                       | 2938                                                                        |
| Ligand                                              | 38                                                                          |
| Water                                               | 121                                                                         |
| All atoms                                           | 3097                                                                        |
| Ramachandran                                        |                                                                             |
| G-factor                                            | 0.08                                                                        |
| Core [%]                                            | 91.6                                                                        |
| Allowed [%]                                         | 8.4                                                                         |
| Generously allowed [%]                              | 0.0                                                                         |
| Dissallowed [%]                                     | 0.0                                                                         |

---
